# Supplementary material for: Haplotype genomic prediction of phenotypic values based on chromosome distance and gene boundaries using low-coverage sequencing in Duroc pigs
Source: PubMed Central journal article supplement (PMC8496108; doi:10.1186/s12711-021-00661-y), 2021-10-07
Supplement: 12711_2021_661_MOESM1_ESM.pdf [file 12711_2021_661_MOESM1_ESM.pdf]

**Table S1 Trait statistics of the Duroc study population**

| Trait | N    | Mean   | SD    | Min    | Max    |
|-------|------|--------|-------|--------|--------|
| AGW   | 3194 | 154.82 | 9.32  | 124.47 | 203.01 |
| ADG   | 3193 | 636.67 | 37.89 | 483.72 | 781.71 |
| BJS   | 3194 | 8.23   | 0.47  | 6      | 10     |
| FCR   | 3041 | 2.17   | 0.20  | 1.27   | 3.04   |
| LMA   | 3193 | 36.32  | 3.57  | 24.19  | 51.04  |
| LMD   | 3194 | 46.65  | 4.08  | 33.9   | 63.4   |
| BF    | 3189 | 10.91  | 2.1   | 6.01   | 19.84  |
| TN    | 3195 | 10.73  | 1.07  | 8      | 15     |

AGW: age to 100 kg live weight. ADG: daily gain at 100 kg live weight. BF: back fat thickness at 100 kg. LMA: loin muscle area at 100 kg. LMD: loin muscle depth at 100 kg. TN: teat number. SD: standard deviation. Min: minimum value. Max: maximum value.

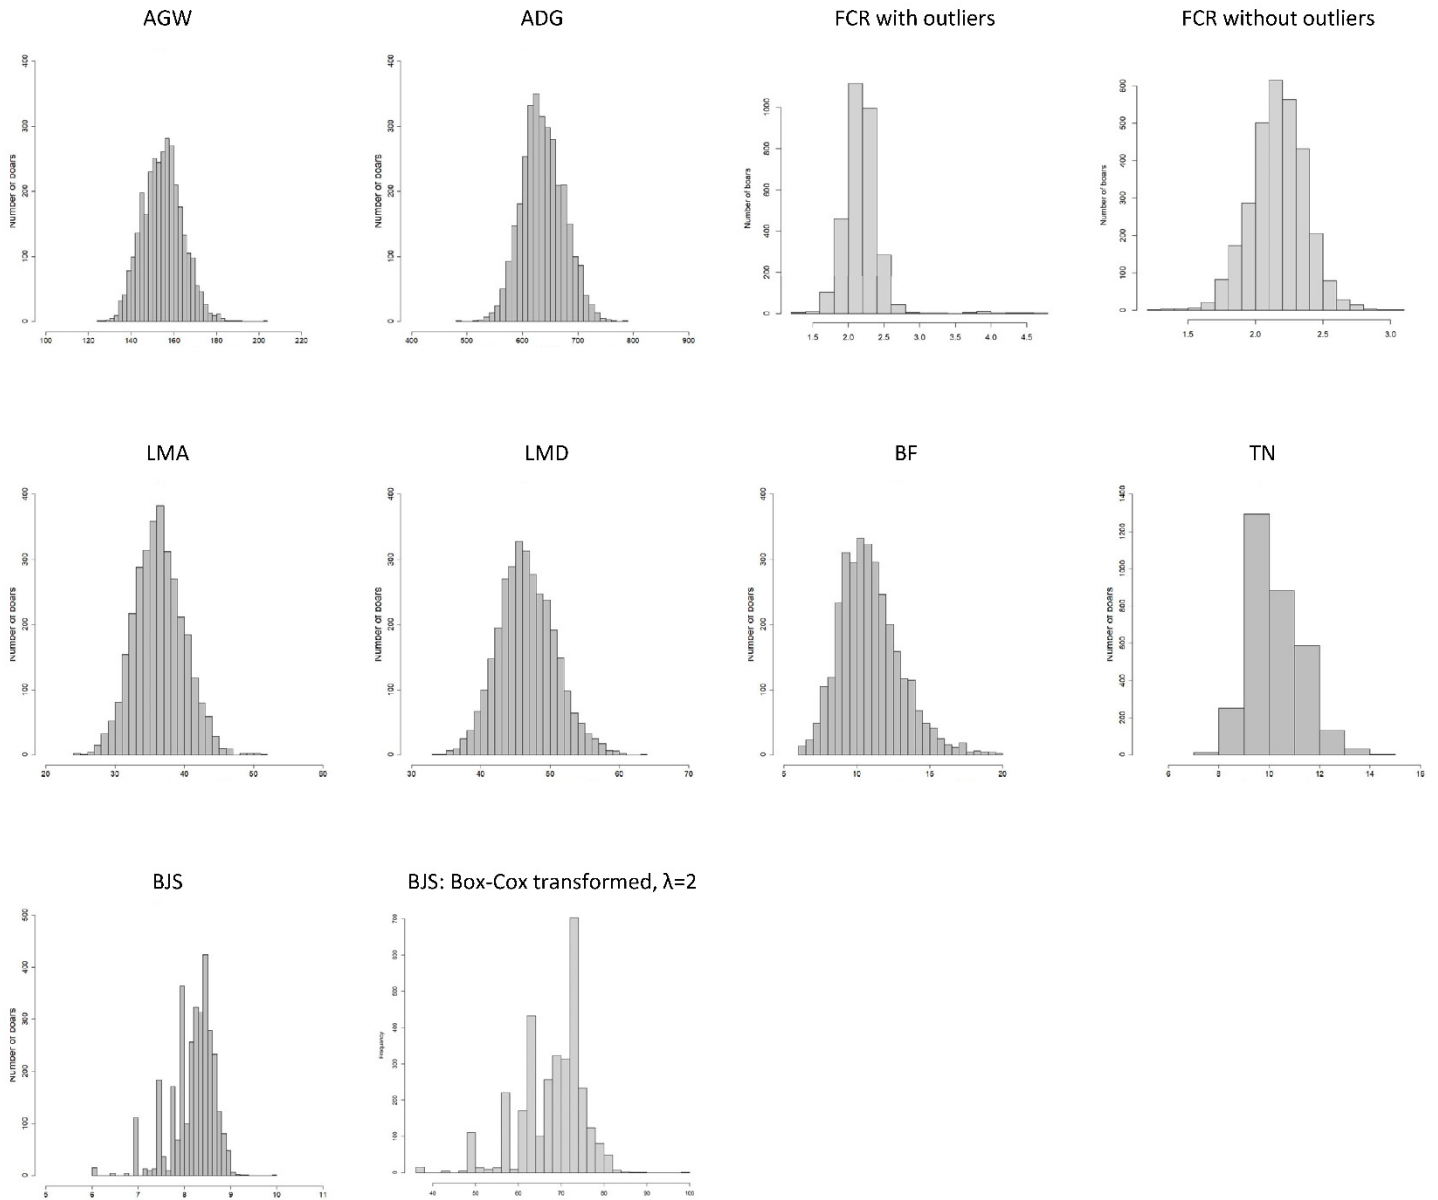

**Figure S1.** Phenotypic distributions. AGW: age at 100 kg live weight. ADG: daily gain during 30-100 kg live weight. FCR: Feed conversion ratio during 30-100 kg. LMA: loin muscle area at 100 kg. LMD: loin muscle depth at 100 kg. BF: back fat thickness at 100 kg. TN: teat number. BJS: body judging score. “FCR without outliers” means phenotypic values that were more than four standard deviations from the mean were removed.

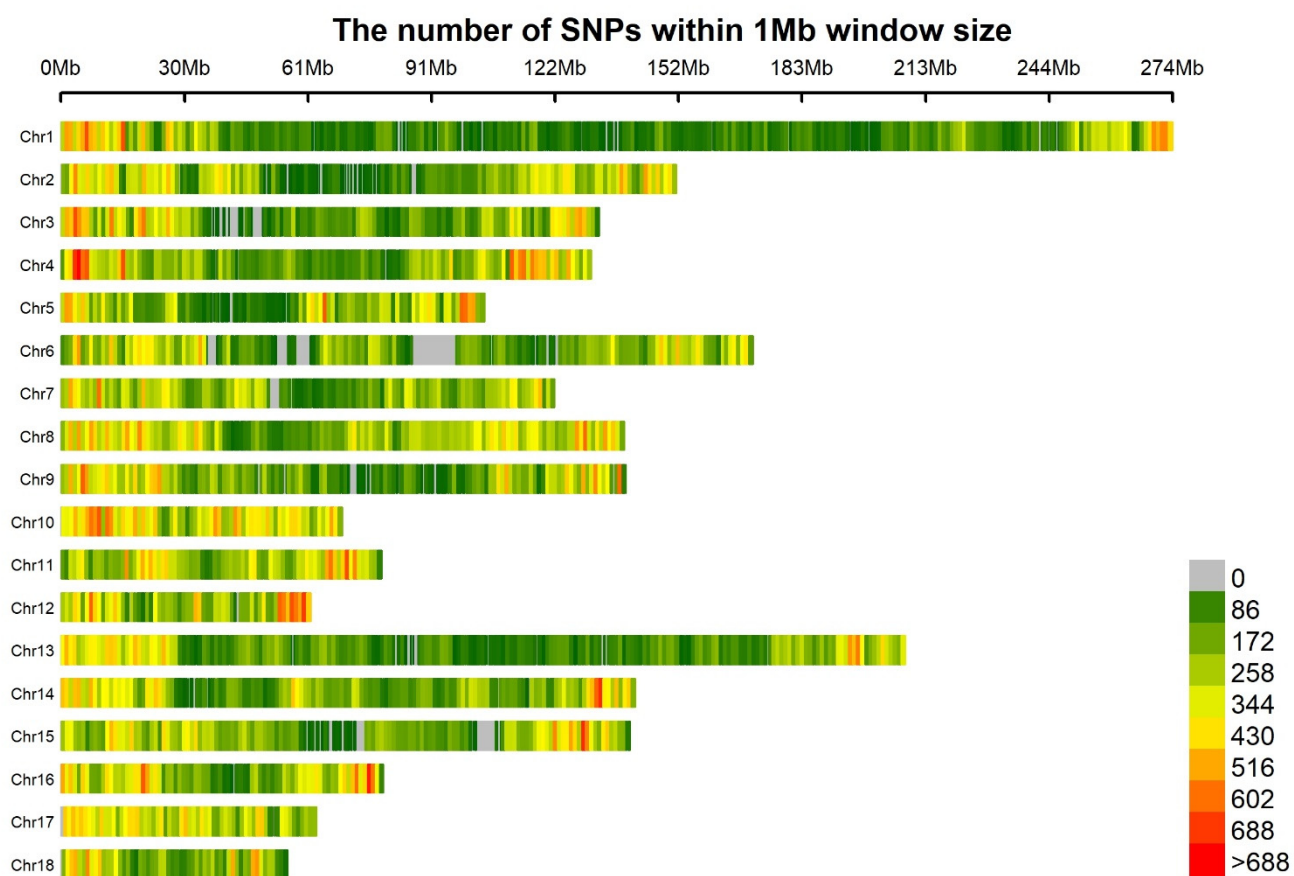

**Figure S2.** Heat map of the SNP density distribution across the autosomes. This figure provides a global view of the SNP coverage of the swine autosomes in the Duroc population used in this study.

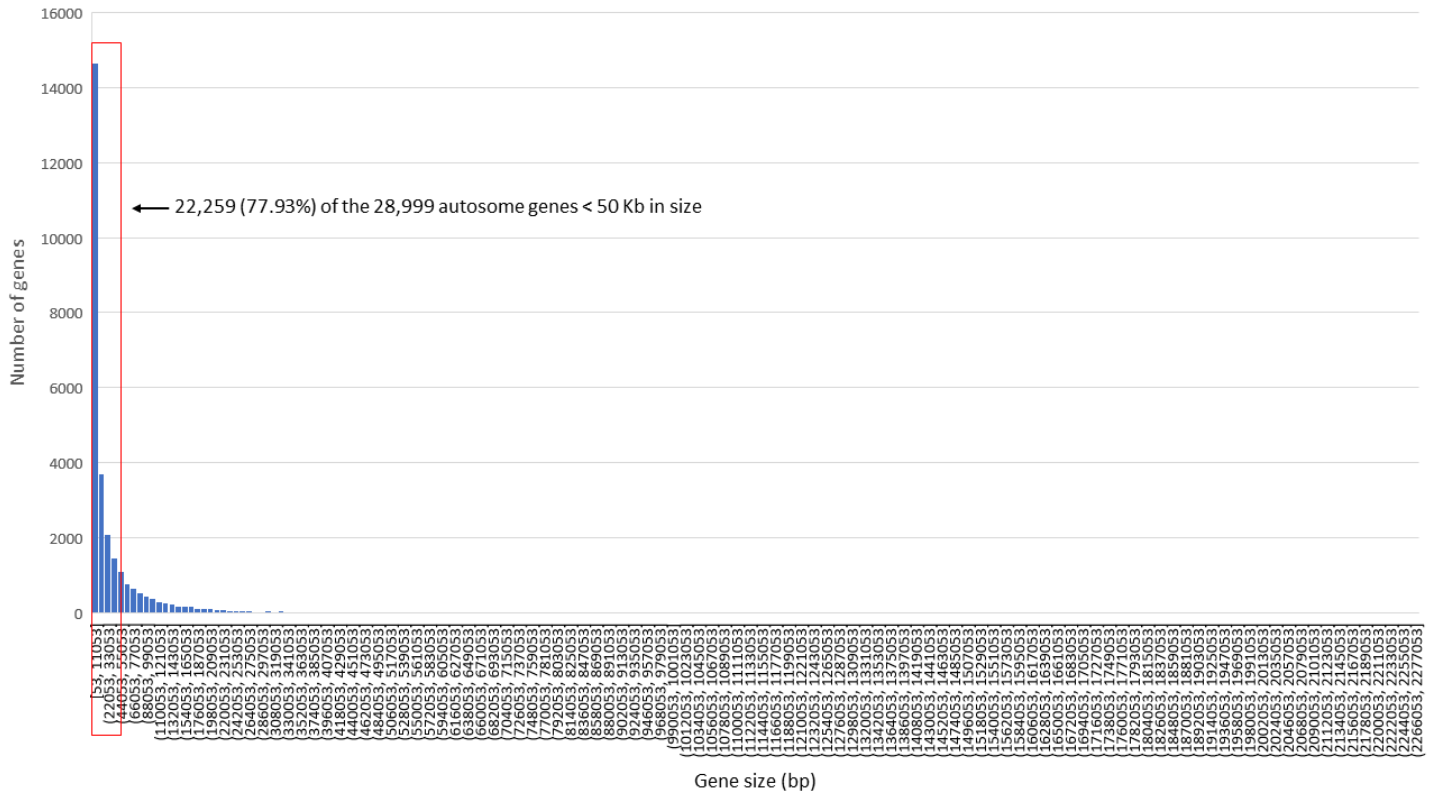

**Figure S3.** Distribution of autosomal gene sizes. This figure shows the distribution of the gene sizes on swine autosomes.
